# Supplementary material
Source: PubMed Central journal article supplement (PMC3341051)
Supplement: 1106300109_pnas.201106300SI.pdf [file 1106300109_pnas.201106300SI.pdf]

# Supporting Information

Zhang et al. 10.1073/pnas.1106300109

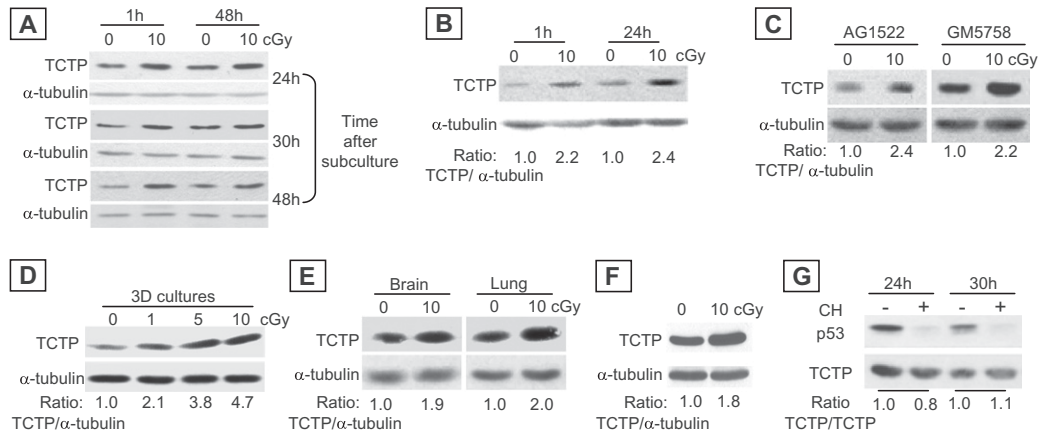

**Fig. S1.** Western blot analyses of translationally controlled tumor protein (TCTP) in normal human cells and in tissues of mice exposed to low-dose  $^{137}\text{Cs}$   $\gamma$  rays or 1 GeV protons. (A) Up-regulation of TCTP in asynchronous cells. Confluent normal human AG1522 cells were subcultured and exposed to acute  $\gamma$  rays at different time points: 24 h later, when the population was enriched in S-phase cells; at 30 h, when the population was enriched in  $G_2/M$  cells; and at 48 h, when dividing cells progressed in the following growth cycle. Cells were harvested 1 or 48 h after irradiation, and TCTP expression was quantified. (B) TCTP was induced up to 24 h after exposure of confluent AG1522 cells to acute 10 cGy of  $\gamma$  rays. (C) TCTP expression in confluent AG1522 or GM5758 normal human skin fibroblasts at 4 h after no exposure or acute exposure to 10 cGy of  $\gamma$  rays. (D) TCTP up-regulation in irradiated AG1522 cells maintained in a 3D architecture. Cells were exposed to low-dose  $\gamma$  rays and harvested 4 h later. (E) TCTP is up-regulated in tissues of C3H/HeJ mice exposed to whole-body irradiation by low-dose  $\gamma$  rays. Tissues were harvested for analysis 4 h after exposure. (F) TCTP is up-regulated in confluent AG1522 cells exposed to 1 GeV protons and harvested 24 h later. (G) Western blot analyses of TCTP in AG1522 confluent cell cultures exposed to 10 cGy irradiation at an acute dose rate (6 cGy/min) in the presence or absence of cycloheximide (2  $\mu\text{g}/\text{mL}$ ). Cells were incubated in cycloheximide for 30 min before irradiation and were harvested for analysis 24 or 30 h later.

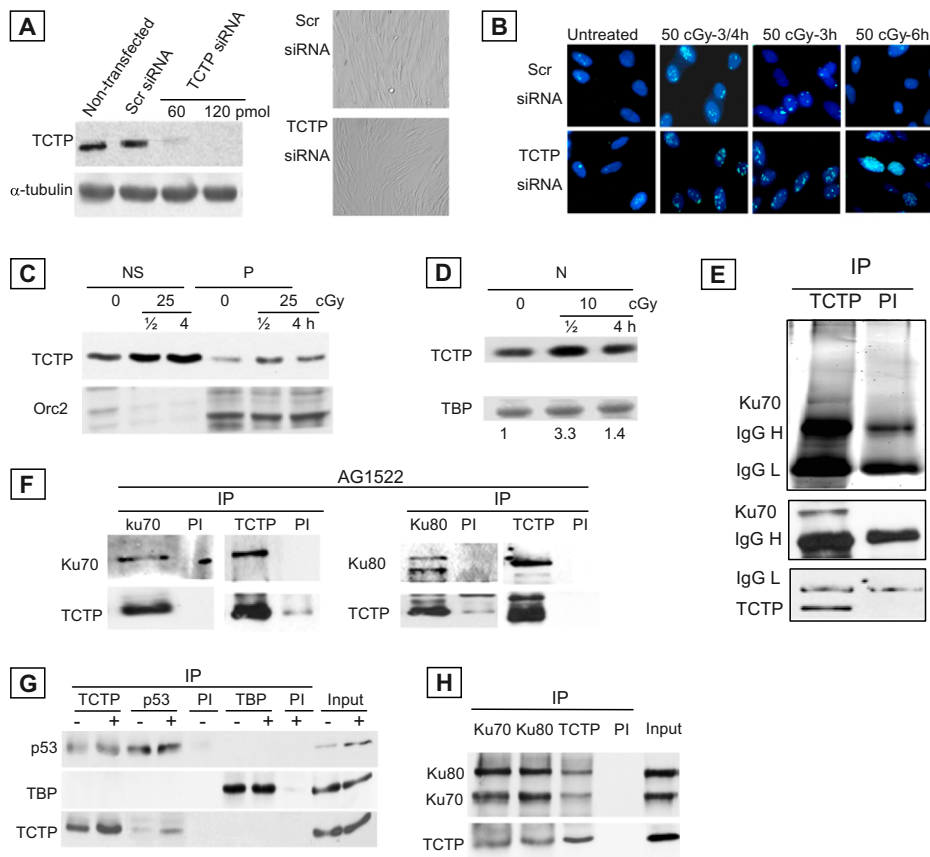

**Fig. S2.** Involvement of TCTP in sensing and repair of  $^{137}\text{Cs}$   $\gamma$  ray-induced DNA damage. (A) (Left) Western blot analysis of TCTP in untreated AG1522 cells or in AG1522 cells transfected with scrambled (Scr) siRNA or TCTP siRNA. (Right) Representative images of AG1522 confluent cells 72 h after transfection with Scr siRNA or TCTP siRNA. (B) Immunostaining for H2A.X phosphorylation (Ser139; green) in Scr siRNA- or TCTP siRNA-transfected AG1522 cells at different times after 50-cGy irradiation. (C) The  $\gamma$  ray-induced up-regulation of TCTP in soluble nuclear fraction (NS) and chromatin-enriched fraction (P). Extracts of AG1522 confluent cells exposed to no or 25-cGy irradiation were fractionated as described in *Materials and Methods*. Orc2, a chromatin-associated protein, was blotted, showing relative loading. (D) Immunoblot analyses show that TCTP levels are up-regulated in nuclei of U2OS confluent cells 0.5 and 4 h after exposure to 10 cGy. (E) (Top) Ku70 detection in mock/preimmune (PI) and TCTP-immunoprecipitated proteins from nuclei of U2OS confluent cells resolved by SDS/PAGE and stained with SYBR Gold. Heavy (H) and light (L) IgG bands are indicated. Western blots for TCTP (Bottom) and Ku70 (Middle) from the same immunoprecipitated samples. IP, immunoprecipitation. (F) Western blot analyses of TCTP, Ku70, and Ku80 following immunoprecipitations with respective antibodies against TCTP, Ku70, and Ku80 in isolated nuclear fractions of AG1522 confluent cells. Rabbit preimmune serum (PI) was used as a control. (G) Ethidium bromide-treated nuclear extracts isolated 30 min after exposure of U2OS confluent cells to no or acute-dose-rate 50-cGy radiation were immunoprecipitated with anti-TCTP, anti-p53, or control anti-TBP antibodies. Mouse or rabbit preimmune serum (PI) was used as a control. Immunoblotting was performed using antibodies against p53, TCTP, or TATA-binding protein (TBP). (H) Immunoblotting of TCTP, Ku70, and Ku80 in ethidium bromide-treated nuclear extracts of control U2OS confluent cells after immunoprecipitation with normal serum (PI) or with antibodies against TCTP, Ku70, or Ku80.

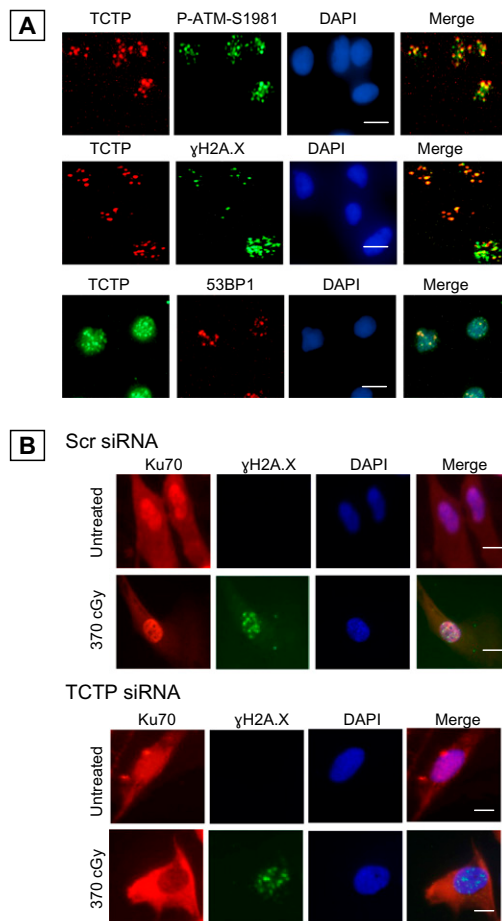

**Fig. S3.** (A) TCTP colocalizes with P-ATM (S1981),  $\gamma$ H2A.X, and 53BP1 following  $^{137}\text{Cs}$   $\gamma$  irradiation. U2OS cells exposed to 100-cGy radiation were preextracted and were fixed 1 h later; they were immunostained with anti-TCTP, anti-P-ATM (S1981), anti- $\gamma$ H2A.X, or anti-53BP1 antibodies. (Scale bars, 10  $\mu\text{m}$ .) (B) U2OS cells transfected with Scr or TCTP siRNA were left untreated or were exposed to 370-cGy radiation. The cells were fixed 0.5 h later and were immunostained in situ with anti-Ku70 (red) and anti- $\gamma$ H2A.X (green) antibodies. (Scale bars, 10  $\mu\text{m}$ .)

**Table S1. Top-ranked proteins modulated in AG1522 confluent cells exposed to 10 cGy of <sup>137</sup>CS  $\gamma$  rays (0.2 cGy/h) as revealed by the isobaric tags for relative and absolute quantitation shotgun proteomics approach**

| Change   | UniProt accession no. | Protein name                                                                               | Ratio* | SD    |
|----------|-----------------------|--------------------------------------------------------------------------------------------|--------|-------|
| Increase | P13693                | Translationally controlled tumor protein (TCTP) (p23) (histamine-releasing factor) (HRF)   | 1.811  | 0.072 |
| Increase | P04083                | Annexin A1                                                                                 | 1.618  | 0.292 |
| Increase | Q16740                | Putative ATP-dependent Clp protease proteolytic subunit, mitochondrial precursor           | 1.566  | 0.293 |
| Increase | P11413                | Glucose-6-phosphate 1-dehydrogenase                                                        | 1.544  | 0.252 |
| Increase | P04264                | Keratin, type II cytoskeletal 1 (Cytokeratin 1)                                            | 1.499  | 0.495 |
| Increase | P17317                | Histone H2A.Z (H2A/Z)                                                                      | 1.495  | 0.16  |
| Increase | Q9P2J5                | Leucyl-tRNA synthetase, cytoplasmic                                                        | 1.466  | 0.091 |
| Increase | P08253                | 72-kDa type IV collagenase precursor                                                       | 1.456  | 0.223 |
| Increase | Q15366                | Poly(rC)-binding protein 2                                                                 | 1.445  | 0.499 |
| Increase | Q10567                | Adapter-related protein complex 1 beta 1 subunit                                           | 1.435  | 0.114 |
| Increase | P51991                | Heterogeneous nuclear ribonucleoprotein A3                                                 | 1.433  | 0.081 |
| Increase | O60664                | Mannose-6-phosphate receptor binding protein 1                                             | 1.421  | 0.195 |
| Increase | Q13596                | Sorting nexin 1                                                                            | 1.407  | 0.093 |
| Increase | O43399                | Tumor protein D54 (hD54)                                                                   | 1.4    | 0.089 |
| Increase | P82675                | Mitochondrial 28S ribosomal protein S5 (S5mt)                                              | 1.395  | 0.094 |
| Increase | Q13151                | Heterogeneous nuclear ribonucleoprotein A0 (hnRNP A0)                                      | 1.391  | 0.047 |
| Increase | O95340                | Bifunctional 3'-phosphoadenosine 5'-phosphosulfate synthetase 2 (PAPS synthetase 2)        | 1.362  | 0.333 |
| Increase | P48681                | Nestin                                                                                     | 1.357  | 0.318 |
| Increase | Q15046                | Lysyl-tRNA synthetase                                                                      | 1.35   | 0.078 |
| Increase | P09651                | Heterogeneous nuclear ribonucleoprotein A1                                                 | 1.325  | 0.028 |
| Increase | Q8VWX9                | Selenoprotein M precursor                                                                  | 1.319  | 0.08  |
| Increase | P23381                | Tryptophanyl-tRNA synthetase                                                               | 1.317  | 0.329 |
| Decrease | P62873                | Guanine nucleotide-binding protein G(I)/G(S)/G(T) beta subunit 1 (Transducin beta chain 1) | 0.613  | 0.38  |
| Decrease | P99999                | Cytochrome c                                                                               | 0.620  | 0.403 |
| Decrease | P10620                | Microsomal GST 1                                                                           | 0.714  | 0.235 |
| Decrease | Q15629                | Translocation associated membrane protein 1                                                | 0.717  | 0.194 |
| Decrease | P35556                | Fibrillin 2 precursor                                                                      | 0.732  | 0.01  |
| Decrease | P61619                | Protein transport protein Sec61 alpha subunit isoform 1                                    | 0.735  | 0.134 |
| Decrease | P30049                | ATP synthase delta chain, mitochondrial precursor                                          | 0.736  | 0.099 |
| Decrease | P53680                | Clathrin coat assembly protein AP17 (Clathrin coat associated protein AP17)                | 0.746  | 0.155 |
| Decrease | Q9Y3D6                | Tetratricopeptide repeat protein 11                                                        | 0.748  | 0.286 |

\*Ratio: protein level in irradiated vs. nonirradiated cells.
